# Supplementary material for: Boosting PVC reactivity through iodination for CO2-derived functionalization
Source: Royal Society of Chemistry journal article supplement (doi:10.1039/d6ra00749j), 2026-03-06
Supplement: d6ra00749j1.pdf [file d6ra00749j1.pdf]

## Supplementary information

### **Boosting PVC Reactivity through Iodination for CO<sub>2</sub>-Derived Functionalization**

Juliette Delcorps, Emna Ben Ayed, Olivier Coulembier

*Laboratory of Polymeric and Composite Materials, Centre of Innovation and Research in Materials  
and Polymers, University of Mons, Place du Parc 23, 7000 Mons, Belgium.*

*E-mail: [olivier.coulembier@umons.ac.be](mailto:olivier.coulembier@umons.ac.be)*

## Table des matières

|                                                                                                                           |    |
|---------------------------------------------------------------------------------------------------------------------------|----|
| 1. PVC iodination.....                                                                                                    | 3  |
| a. Nuclear Magnetic Resonance .....                                                                                       | 3  |
| b. Fourier Transform Infrared Spectroscopy .....                                                                          | 3  |
| c. Thermogravimetric Analysis .....                                                                                       | 4  |
| d. Size Exclusion Chromatography .....                                                                                    | 4  |
| e. X-ray Photoelectron Spectroscopy .....                                                                                 | 5  |
| f. Differential Scanning Calorimetry .....                                                                                | 6  |
| g. Supplementary Table S1 – Summary of physicochemical and thermal properties of pristine and iodinated PVC samples. .... | 7  |
| 2. CO <sub>2</sub> BAM characterization .....                                                                             | 7  |
| a. Nuclear Magnetic Resonance .....                                                                                       | 7  |
| b. Thermogravimetric Analysis .....                                                                                       | 9  |
| 3. Reaction between iodinated PVC and DBU-based CO <sub>2</sub> BAM – Product characterization.....                       | 10 |

# 1. PVC iodination

## a. Nuclear Magnetic Resonance

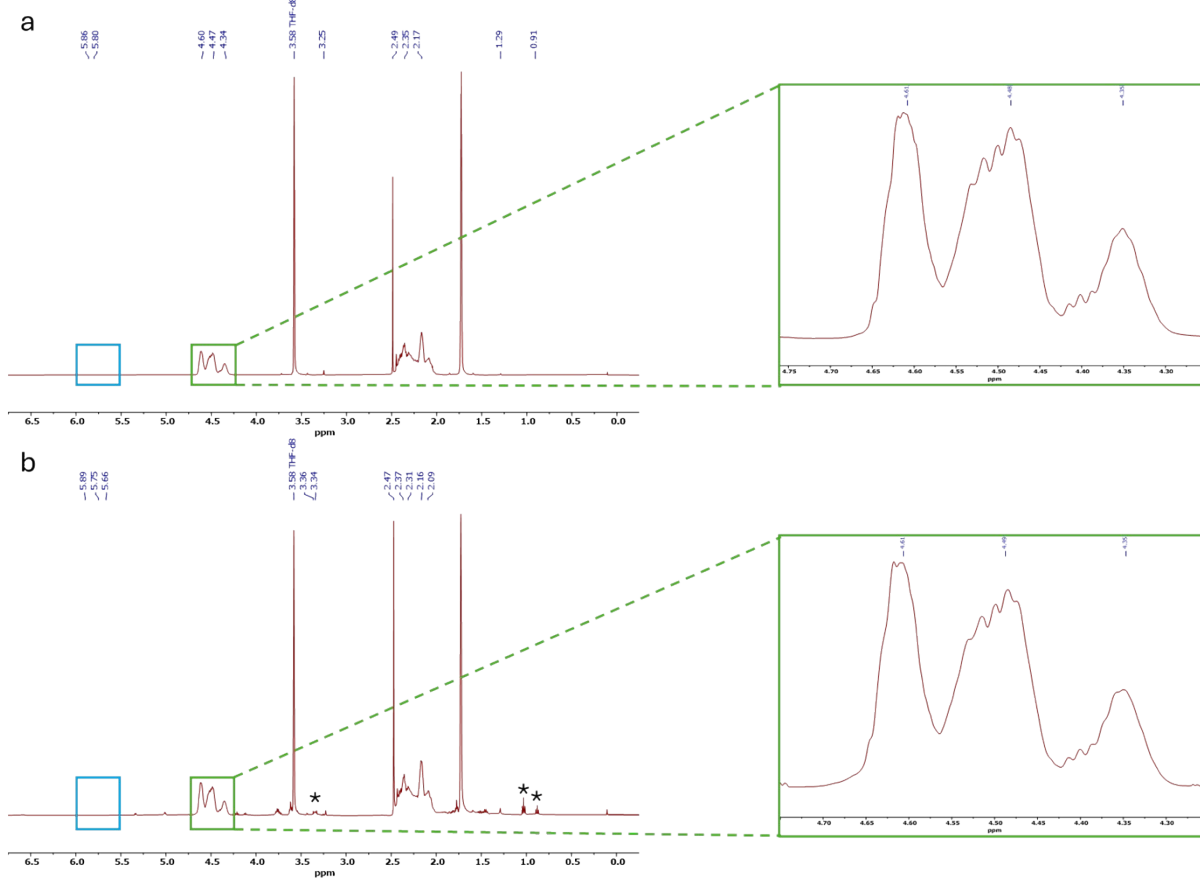

**Supplementary Figure S1** –  $^1\text{H}$  NMR spectra of a) PVC and b) PVC iodinated via phase-transfer catalysis for 24h. The remaining TBAB in b) is designated by asterisks (\*).

## b. Fourier Transform Infrared Spectroscopy

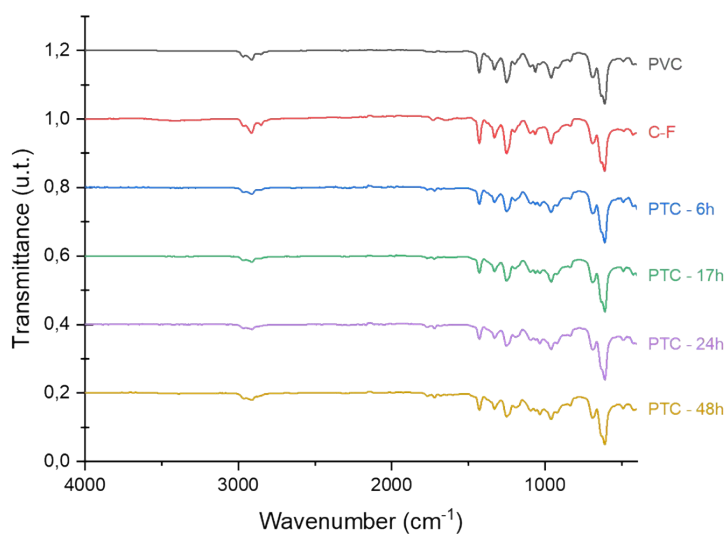

**Supplementary Figure S2** – FT-IR of PVC and modified PVC samples iodinated via the Conant-Finkelstein reaction (C-F) or phase transfer catalysis (PTC) for 6, 17, 24, or 48 hours.

### c. Thermogravimetric Analysis

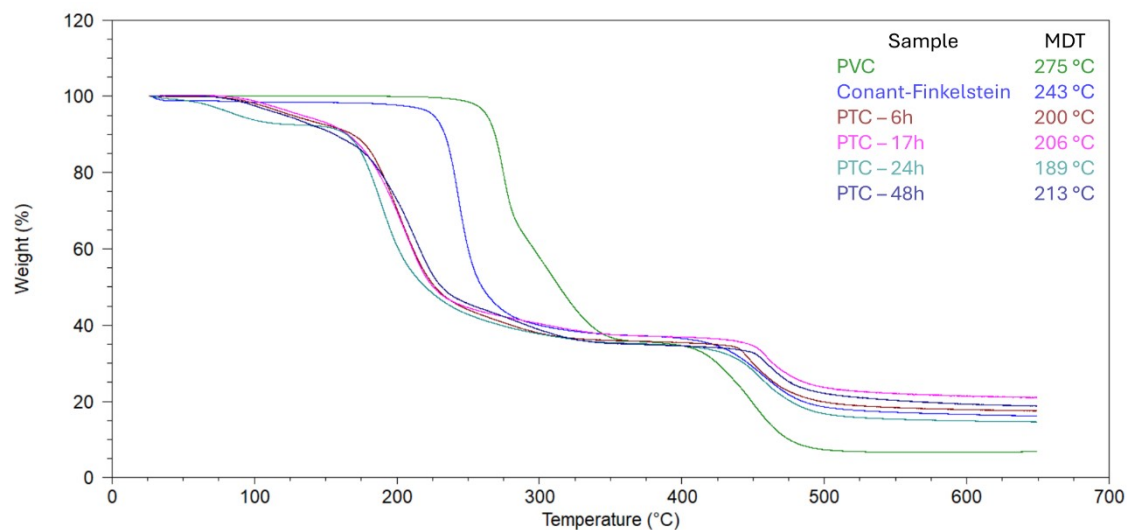

**Supplementary Figure S3** – TGA of PVC and modified PVC samples iodinated via the Conant-Finkelstein reaction (C-F) or phase transfer catalysis (PTC) for 6, 17, 24, or 48 hours.

### d. Size Exclusion Chromatography

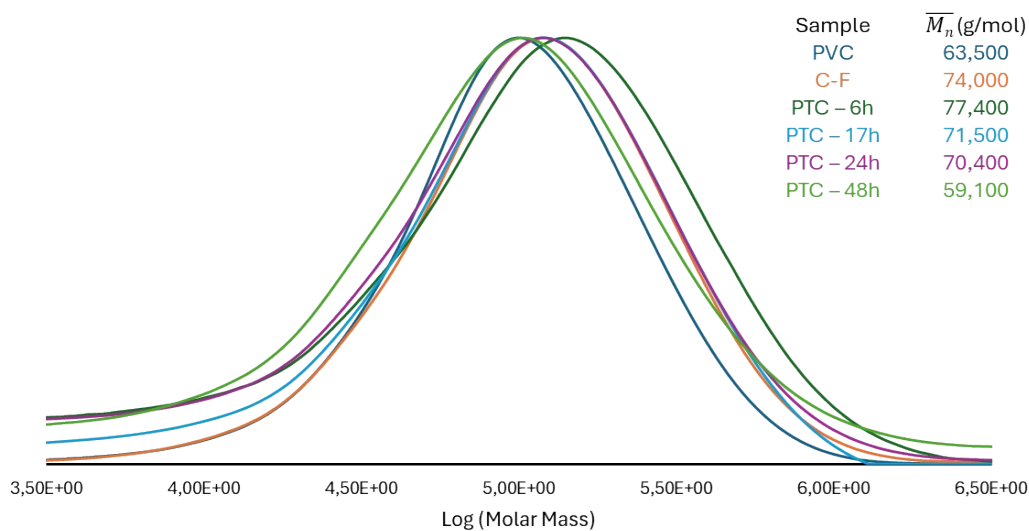

**Supplementary Figure S4** – SEC traces of PVC and modified PVC samples iodinated via the Conant-Finkelstein reaction (C-F) or phase transfer catalysis (PTC) for 6, 17, 24, or 48 hours.

### e. X-ray Photoelectron Spectroscopy

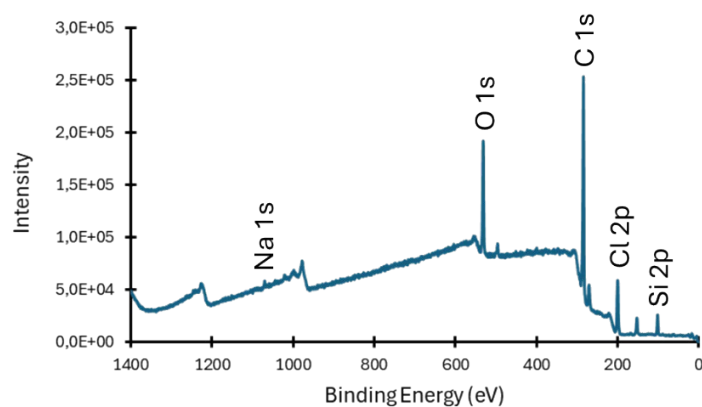

Supplementary Figure S5 – XPS spectrum of PVC.

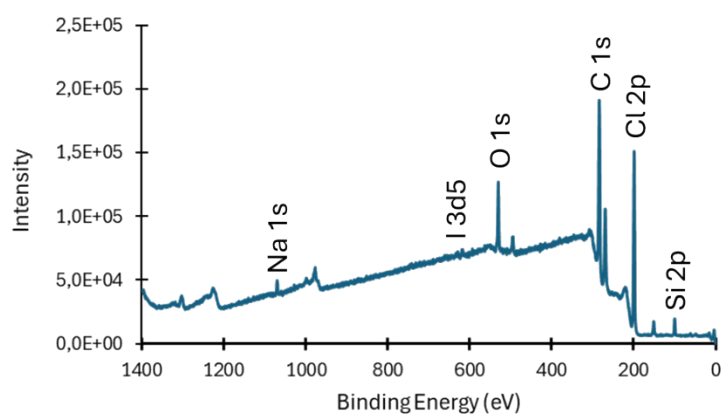

Supplementary Figure S6 – XPS spectrum of PVC iodinated via the Conant-Finkelstein reaction.

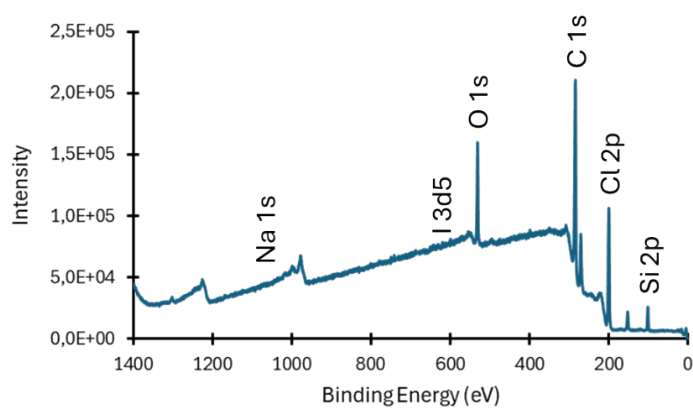

Supplementary Figure S7 – XPS spectrum of PVC iodinated via phase transfer catalysis for 6 hours.

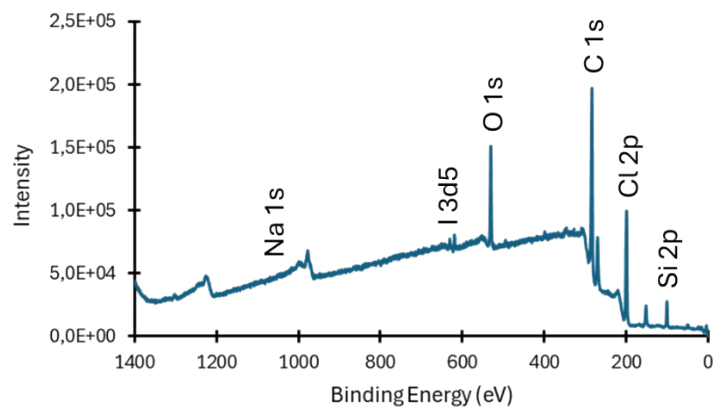

**Supplementary Figure S8** – XPS spectrum of PVC iodinated via phase transfer catalysis for 17 hours.

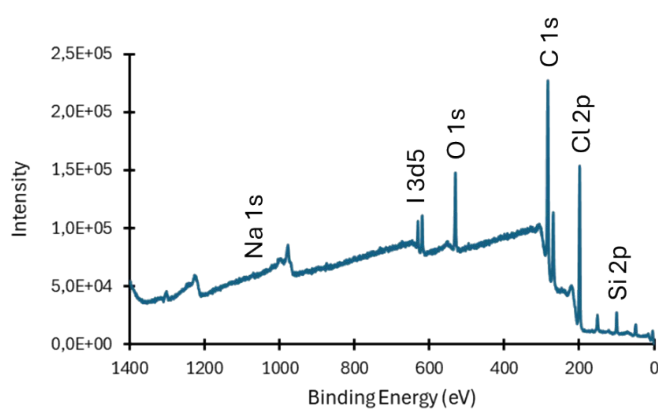

**Supplementary Figure S9** – XPS spectrum of PVC iodinated via phase transfer catalysis for 24 hours.

### f. Differential Scanning Calorimetry

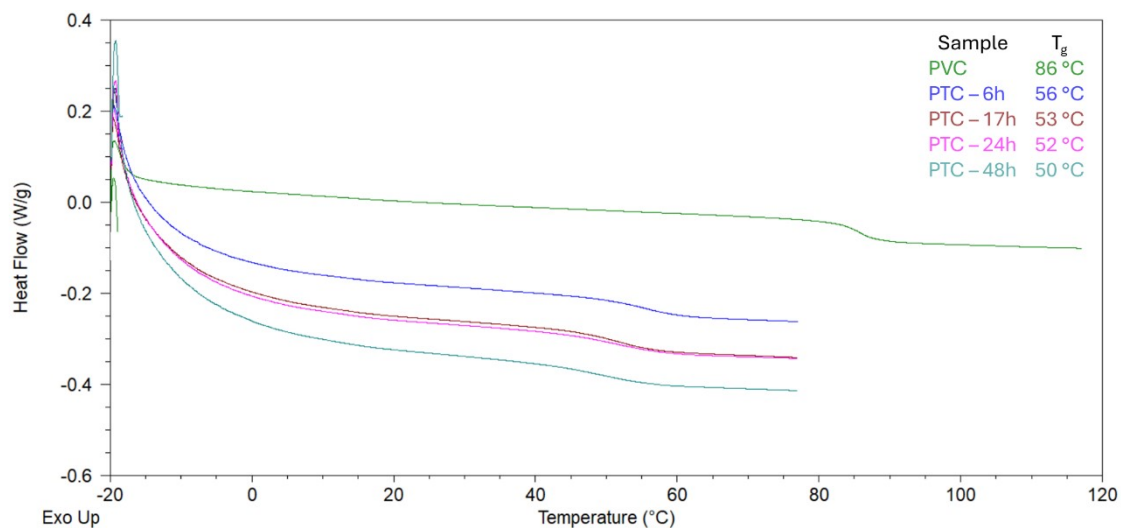

**Supplementary Figure S10** – DSC of PVC and modified PVC samples iodinated via phase transfer catalysis (PTC) for 6, 17, 24, or 48 hours.

g. **Supplementary Table S1** – Summary of physicochemical and thermal properties of pristine and iodinated PVC samples.

| <i>Method</i> | <i>t</i> (h) | <i>MDT</i> (°C) | $\bar{M}_n$ (g/mol) | <i>C 1s</i> (at%) | <i>Cl 2p</i> (at%) | <i>I 3d5</i> (at%) | <i>Na 1s</i> (at%) | <i>T<sub>g</sub></i> (°C) | <i>Contact angle</i> (°) |
|---------------|--------------|-----------------|---------------------|-------------------|--------------------|--------------------|--------------------|---------------------------|--------------------------|
| 1             | PVC          | 0               | 275                 | 63,500            | 73.52              | 6.53               | 0                  | 86                        | 85.6 ± 1.7               |
| 2             | C-F          | 24              | 243                 | 74,000            | 67.30              | 19.23              | 0.10               | /                         | /                        |
| 3             | PTC          | 6               | 200                 | 77,400            | 69.78              | 12.48              | 0.05               | 56                        | 86.8 ± 1.1               |
| 4             | PTC          | 17              | 206                 | 71,500            | 70.29              | 12.14              | 0                  | 53                        | 85.5 ± 2.3               |
| 5             | PTC          | 24              | 189                 | 70,400            | 69.87              | 15.79              | 0.16               | 52                        | 85.9 ± 1.6               |
| 6             | PTC          | 48              | 213                 | 59,100            | 67.47              | 17.37              | 0.23               | 50                        | 83.4 ± 4.3               |

## 2. CO<sub>2</sub>BAM characterization

### a. Nuclear Magnetic Resonance

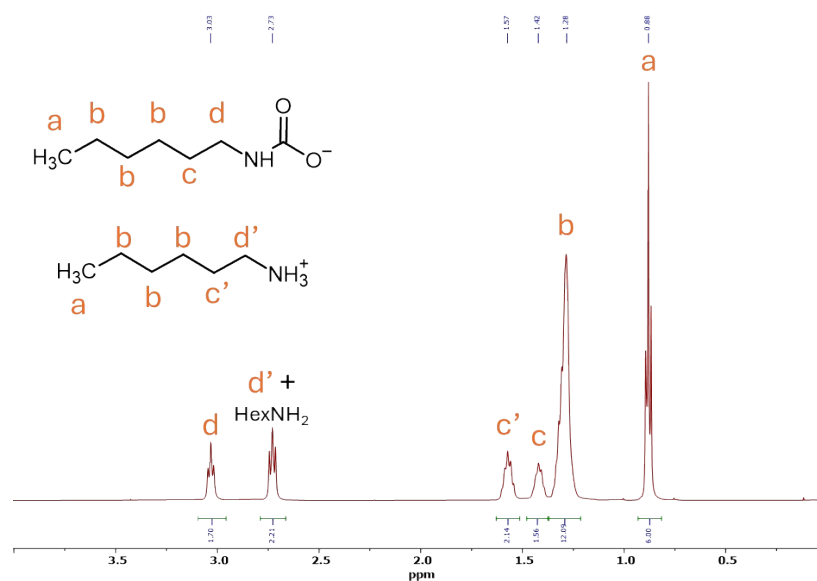

**Supplementary Figure S11** – <sup>1</sup>H NMR spectrum of the amine only-based CO<sub>2</sub>BAM.

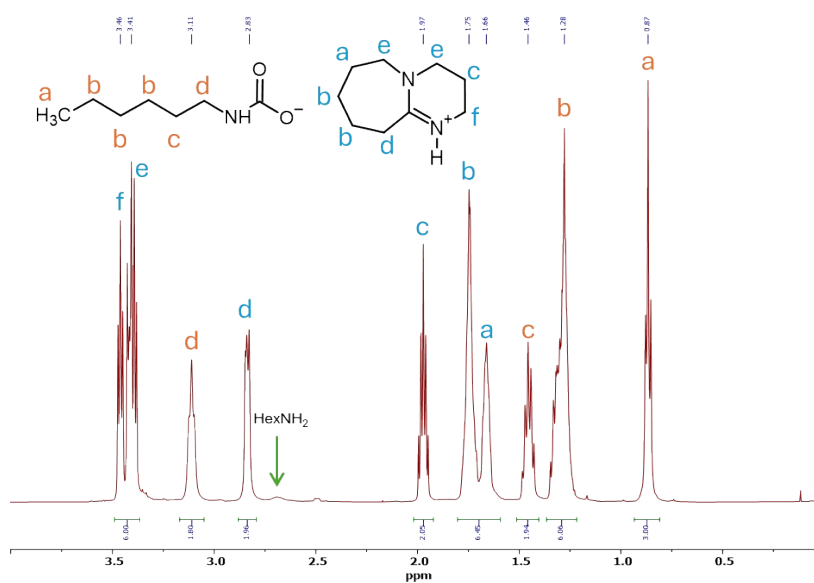

Supplementary Figure S12 – <sup>1</sup>H NMR spectrum of the hexylamine and DBU-based CO<sub>2</sub>BAM.

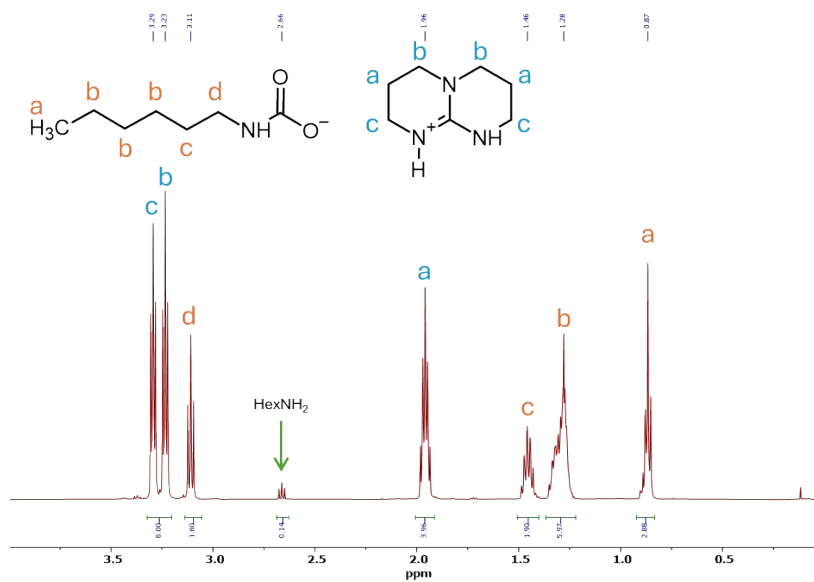

Supplementary Figure S13 – <sup>1</sup>H NMR spectrum of the hexylamine and TBD-based CO<sub>2</sub>BAM.

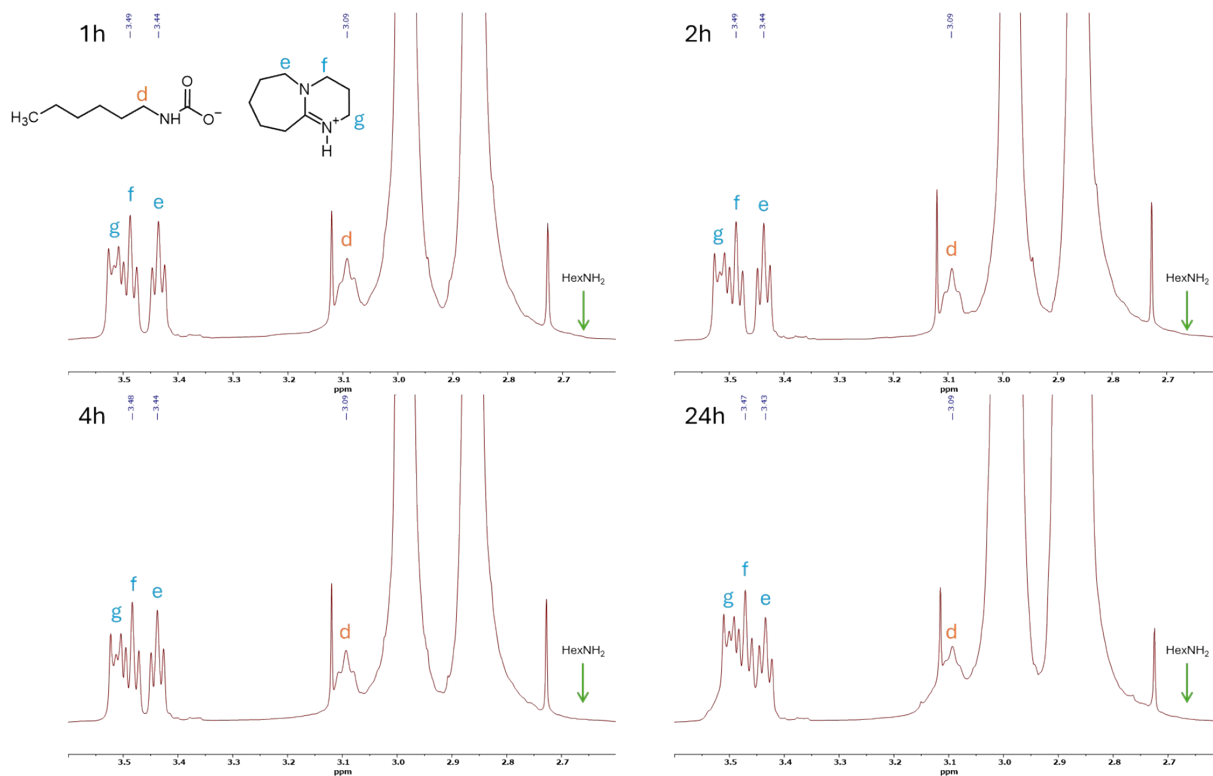

**Supplementary Figure S14** – Stability of DBU-based CO<sub>2</sub>BAM of 1-hexylamine in solution in DMF studied by <sup>1</sup>H NMR spectroscopy. The green arrow indicates where free hexylamine should appear in case of CO<sub>2</sub>BAM degradation.

## b. Thermogravimetric Analysis

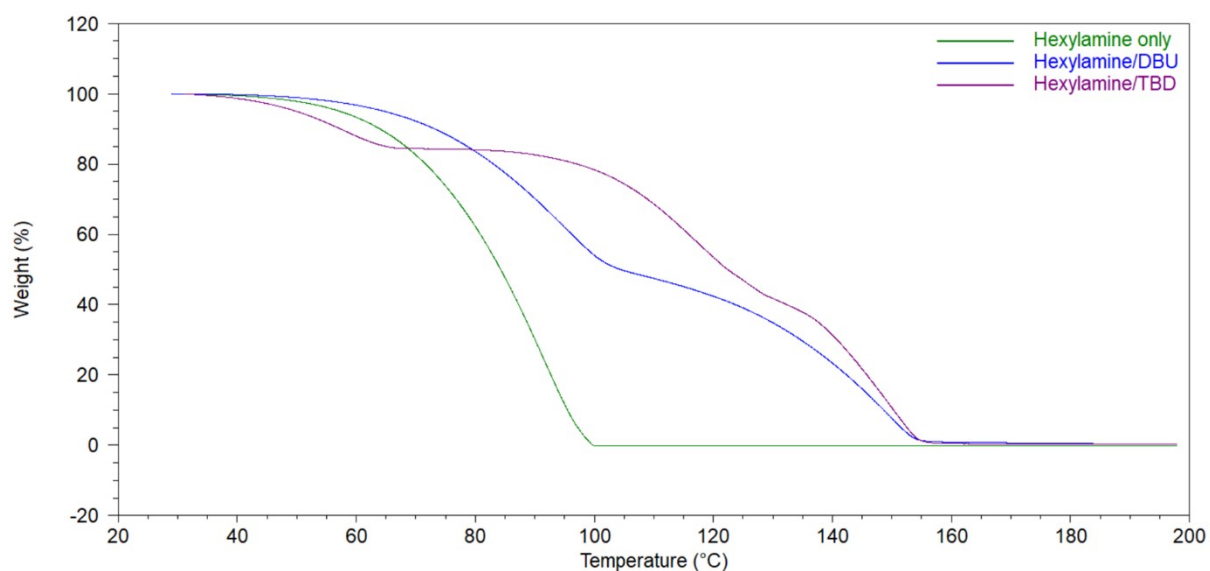

**Supplementary Figure S15** – TGA thermograms of pristine 1-hexylamine, and hexylamine/DBU and hexylamine/TBD-based CO<sub>2</sub>BAMs.

### 3. Reaction between iodinated PVC and DBU-based CO<sub>2</sub>BAM – Product characterization

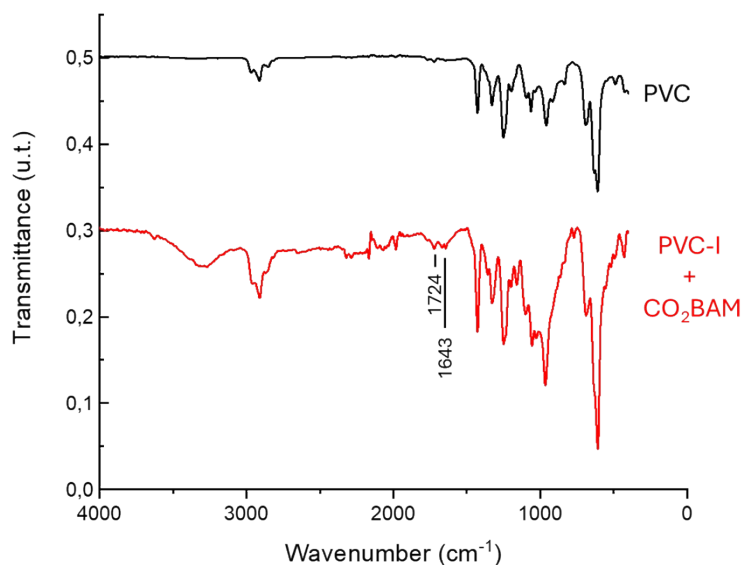

**Supplementary Figure S16** – FT-IR spectra of pristine PVC and the product of reaction between PVC-I and the DBU-based CO<sub>2</sub>BAM of 1-hexylamine.

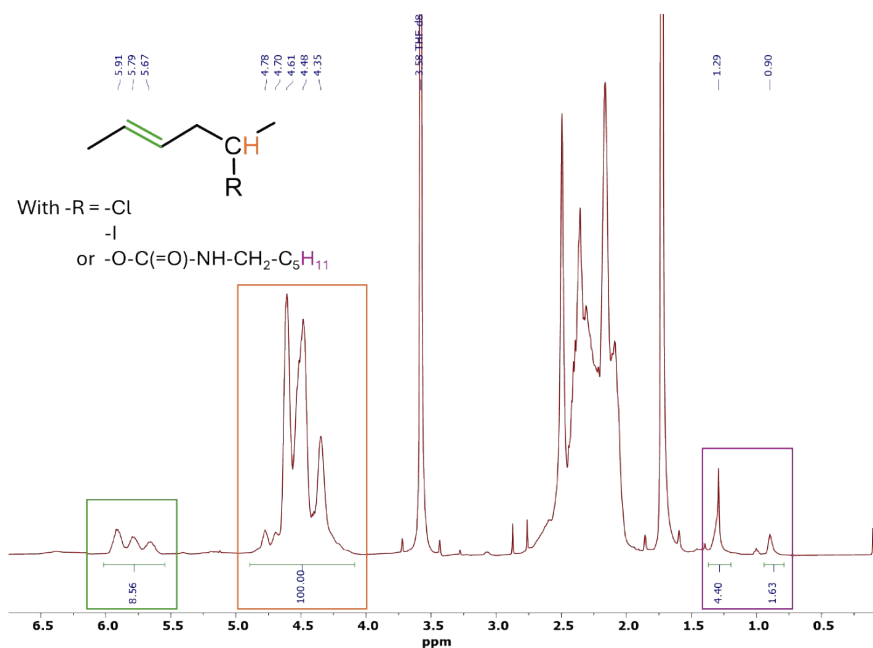

**Supplementary Figure S17** - <sup>1</sup>H NMR spectrum of the reaction product between PVC-I and the DBU-based CO<sub>2</sub>BAM of 1-hexylamine.
